# Supplementary material
Source: publisher figshare collection journal article supplement (https://tandf.figshare.com/articles/dataset/_/1478810)
Supplement: Supplementary file 2 [file 1]

*Pectinatella magnifica*

*Entalophoroecia* cf. *robusta*

*Diplosolen obelia*

*Cardioecia watersi*

*Frondipora verrucosa*

*Hornera foliacea*

*Hornera* cf. *caespitosa*

*Hornera robusta*

*Cinctipora\_elegans*

*Favosipora\_rosea*

*Plagioecia patina*

*Plagioecia patina*

*Disporella pristis*

*Disporella hispida fimbriata*

*Disporella* cf. *neapolitana*

*Crisia sigmoidea*

*Crisia denticulata*

*Crisia fistulosa*

*Tubulipora liliacea*

*Idmidronea atlantica*

*Tennysonia stellata*

*Tennysonia stellata*

*Annectocyma tubulosa*

'*Heteropora*' sp.

'*Hastingsia*' *whitteni* sp. nov.

'*Heteropora*' *neozelanica*

*Diaperoecia purpurascens*

0.06
